# Supplementary material for: A community-driven reconstruction of the Aspergillus niger metabolic network
Source: PubMed Central journal article supplement (PMC6158834; doi:10.1186/s40694-018-0060-7), 2018-09-26
Supplement: 40694_2018_60_MOESM8_ESM.pdf [file 40694_2018_60_MOESM8_ESM.pdf]

Glycolysis

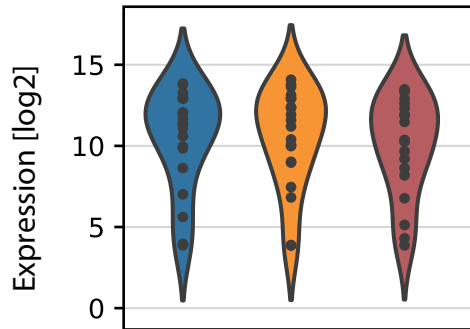

Pentose-Phosphate-Pathway

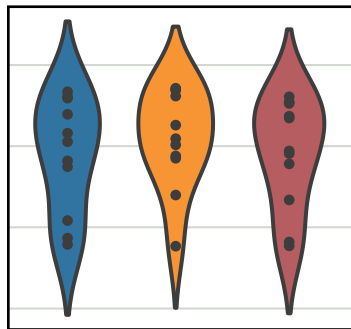

TCA cycle

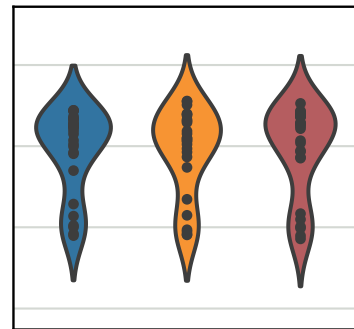

Xylose catabolism

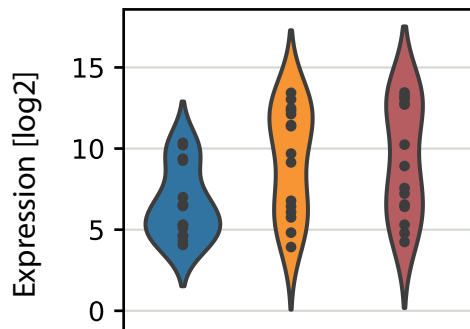

Arabinose catabolism

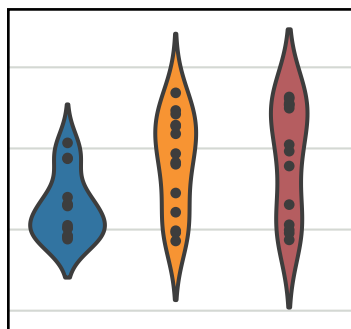

Plant biomass degradation

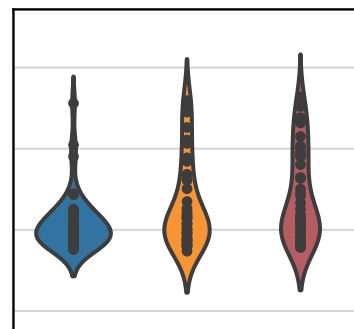

Glucose Xylose Arabinose

Glucose Xylose Arabinose

Glucose Xylose Arabinose
