# Supplementary material for: A community-driven reconstruction of the Aspergillus niger metabolic network
Source: PubMed Central journal article supplement (PMC6158834; doi:10.1186/s40694-018-0060-7), 2018-09-26

Expression profile of the ada cluster

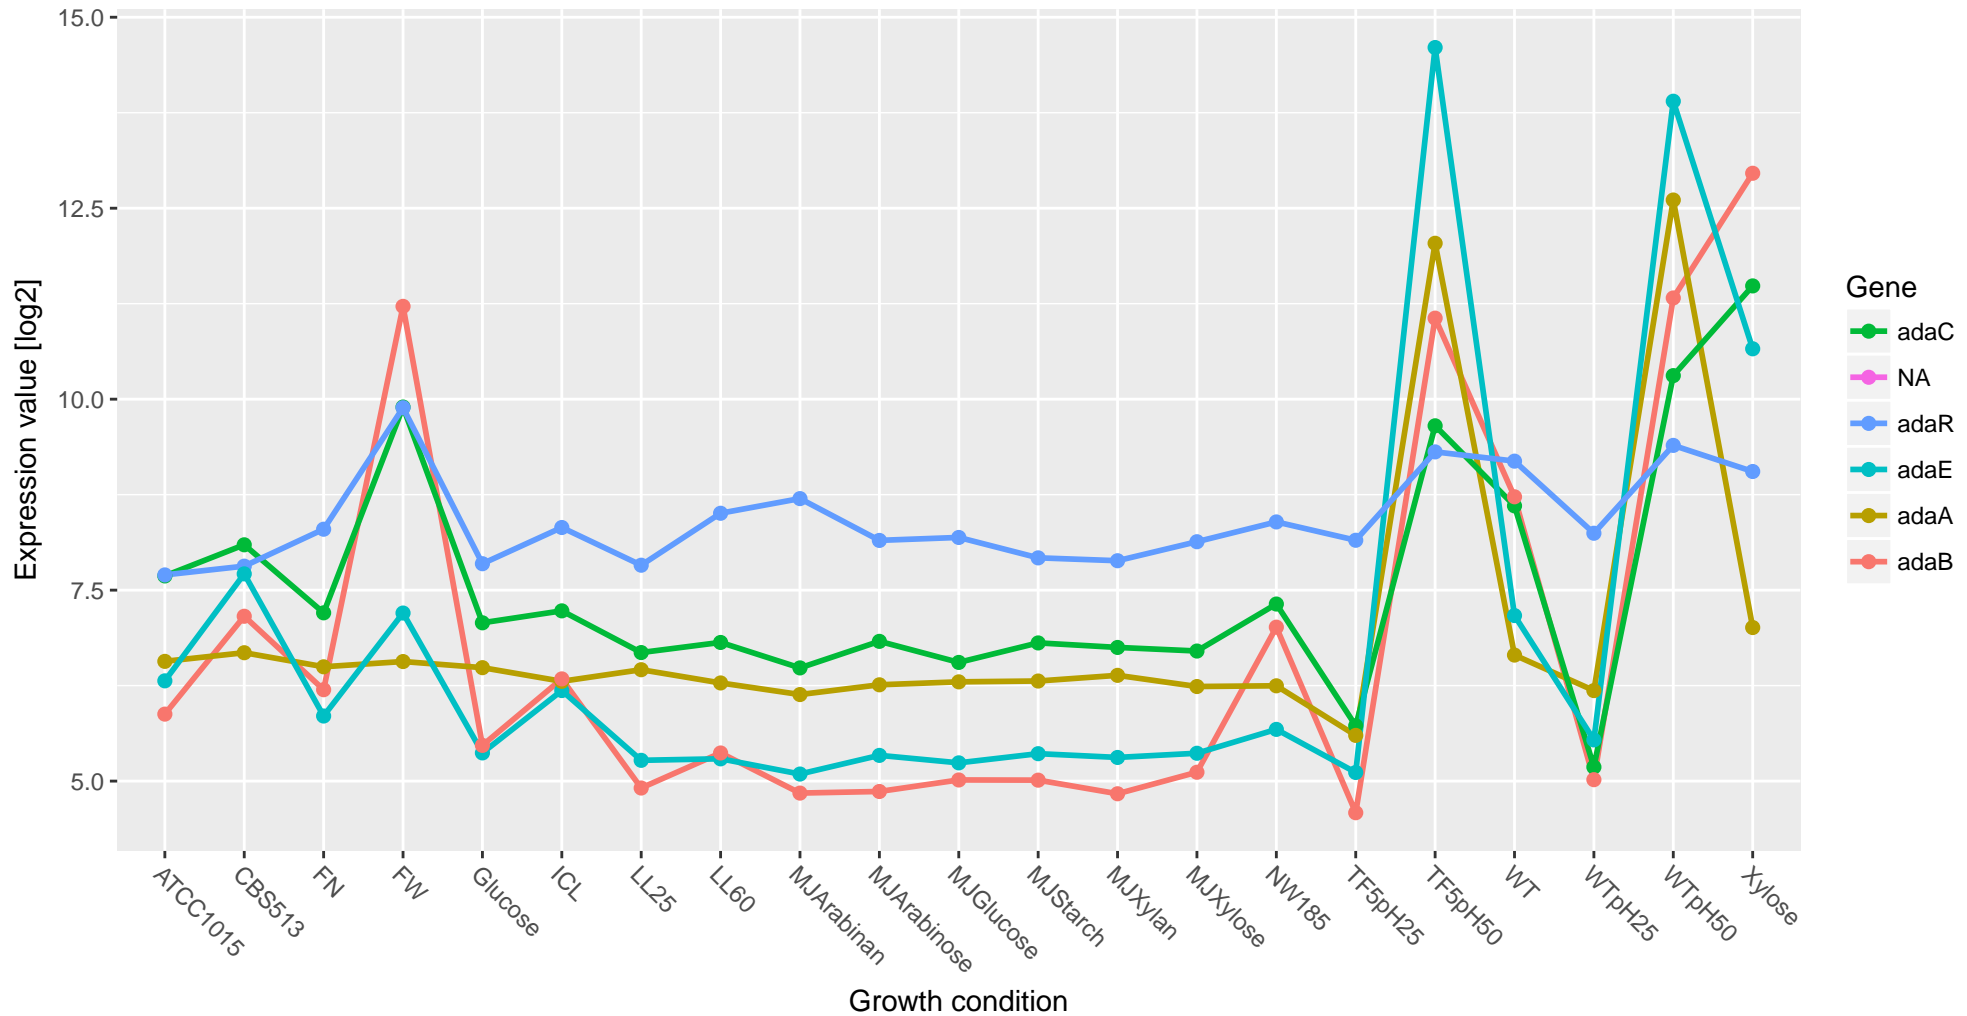

Supplement: 40694_2018_60_MOESM10_ESM.pdf [file 40694_2018_60_MOESM10_ESM.pdf]
